# Supplementary material for: A cucurbit[8]uril inclusion complex with 1,7-dimethyl-1,4,7,10-tetraazacyclododecane tetrachloride
Source: Royal Society of Chemistry journal article supplement (doi:10.1039/b9nj00218a), 2009-11-28
Supplement: b9nj00218a.pdf [file b9nj00218a.pdf]

Observed correlation of hydrogen atoms with Specific protons in gCOSY and  
 NOESY spectra of inclusion compound at 600MHz in D<sub>2</sub>O

| H               | $\delta_H$ (ppm) | gCOSY           |                 |                 | NOESY          |                 |                 |
|-----------------|------------------|-----------------|-----------------|-----------------|----------------|-----------------|-----------------|
|                 |                  | ss              | m               | w               | ss             | m               | w               |
| H <sub>1</sub>  | 1.581(s)         |                 |                 |                 |                |                 |                 |
| H <sub>2a</sub> | 1.841(m)         | H <sub>2e</sub> | H <sub>3a</sub> |                 |                |                 | H <sub>2e</sub> |
| H <sub>2e</sub> | 2.112(m)         |                 | H <sub>3e</sub> |                 |                |                 | H <sub>2a</sub> |
| H <sub>3a</sub> | 2.325(m)         | H <sub>3e</sub> |                 | H <sub>2a</sub> |                | H <sub>3e</sub> |                 |
| H <sub>3e</sub> | 2.804(m)         | H <sub>3a</sub> | H <sub>2e</sub> |                 |                | H <sub>3a</sub> |                 |
| H <sub>b</sub>  | 4.160(d)         | H <sub>a</sub>  |                 |                 | H <sub>a</sub> | H <sub>c</sub>  |                 |
| H <sub>c</sub>  | 5.453(s)         |                 |                 |                 |                |                 |                 |
| H <sub>a</sub>  | 5.643(d)         | H <sub>b</sub>  |                 |                 | H <sub>b</sub> |                 |                 |

ss: Very intense, m: Fairly intense, w: Weak intense

Observed correlation of carbon atoms with specific protons in <sup>13</sup>C、DEPT、gHSQC  
 and gHMBC Spectra of inclusion compound at 150MHz in D<sub>2</sub>O

| C                | $\delta_c$ (ppm) | DEPT            | gHSQC                            | gHMBC                                          |                |                |
|------------------|------------------|-----------------|----------------------------------|------------------------------------------------|----------------|----------------|
|                  |                  |                 |                                  | ss                                             | m              | w              |
| C <sub>1</sub>   | 41.316           | CH <sub>3</sub> | H <sub>1</sub>                   |                                                |                |                |
| C <sub>3</sub>   | 42.338           | CH <sub>2</sub> | H <sub>3a</sub> 、H <sub>3e</sub> |                                                |                |                |
| C <sub>2</sub>   | 51.392           | CH <sub>2</sub> | H <sub>2a</sub> 、H <sub>2e</sub> |                                                | H <sub>1</sub> |                |
| C <sub>a,b</sub> | 54.059           | CH <sub>2</sub> | H <sub>a</sub> 、H <sub>b</sub>   |                                                |                |                |
| C <sub>c</sub>   | 72.224           | CH              | H <sub>c</sub>                   | H <sub>a</sub>                                 | H <sub>b</sub> | H <sub>c</sub> |
| C=O              | 157.030          | C=O             |                                  | H <sub>a</sub> 、H <sub>b</sub> 、H <sub>c</sub> |                |                |

ss: Very intense, m: Fairly intense, w: Weak intense
